# Supplementary material for: Interpretation of geostationary satellite aerosol optical depth (AOD) over East Asia in relation to fine particulate matter (PM 2.5 ): insights from the KORUS-AQ aircraft campaign and seasonality
Source: Copernicus journal article supplement (doi:10.5194/acp-2021-413), 2021-07-27
Supplement: Supplementary file 1 [file acp-2021-413-supplement.pdf]

1 *Supplement of*  
2 **Interpretation of geostationary satellite aerosol optical depth**  
3 **(AOD) over East Asia in relation to fine particulate matter**  
4 **(PM<sub>2.5</sub>): insights from the KORUS-AQ aircraft campaign and**  
5 **seasonality**

6 Shixian Zhai et al.

7 *Correspondence:* Shixian Zhai (zhaisx@g.harvard.edu)

8

9 **Supplementary text: Identification of dust plumes.**

10 Earlier studies (Heim et al., 2020; Peterson et al., 2019) have shown dust events occurring over South Korea during  
11 KORUS-AQ. Here we identify dust plumes by examining KORUS-AQ measurements of remote sensed extinction  
12 coefficient profiles, in situ aerosol size distributions, and in situ dust and non-dust (sulfate-nitrate-ammonium +  
13 organics) aerosol concentrations aboard the DC-8 aircraft. Figure S2 (top panel) shows the evolvement of aerosol  
14 extinction coefficient profiles during KORUS-AQ (extinction coefficient profiles on individual days can be found  
15 at: <https://science-data.larc.nasa.gov/lidar/korus-aq/>). High extinction coefficients ( $> 0.1 \text{ km}^{-1}$ ) in the lower free  
16 troposphere ( $\sim 4 \text{ km}$ ) were shown on May 5 and 7, reflecting long-range transport of dust in the free troposphere  
17 (Heim et al., 2020). On May 12, enhancement of extinction coefficients was detected at 6-8 km.

18 Figure S3 shows the vertical profiles of cross-section weighted effective radius ( $R_e$ ), dust, and SNA + organic  
19 aerosol concentrations. The cross-section weighted effective radius  $R_e$  has been shown as a key parameter relating to  
20 the optical properties for aerosols (Chin et al., 2002; Liu et al., 2009), and is calculated as:

21 
$$R_e = \frac{\sum_i N_i D_i^3}{2 * \sum_i N_i D_i^2}$$

22 Where  $N_i$  is the number of particles in the  $i^{\text{th}}$  size bin, and  $D_i$  is the center diameter for the  $i^{\text{th}}$  size bin. On May 5,  $R_e$   
23 starts to increase from  $0.2 \mu\text{m}$  at  $\sim 4\text{km}$  altitude and reaches to  $\sim 0.6 \mu\text{m}$  at  $\sim 6-7 \text{ km}$  altitude. Correspondingly, dust  
24 concentration on May 5 increased to  $\sim 20 \mu\text{g m}^{-3}$  at  $\sim 4\text{km}$  (SAGA  $\text{Ca}^{2+}$  and  $\text{Na}^+$  measurements at altitude  $> 4 \text{ km}$  on  
25 May 5 are missing), with negligible SNA + organic aerosol concentration above 2km (Figure S3c). On May 7, the  
26 large  $R_e$  ( $\sim 0.6 \mu\text{m}$ ) subsides to the surface, with median dust concentration at the surface reaches near  $60 \mu\text{g m}^{-3}$ ,  
27 suggesting dust subsidence on this day. May 12 observed large  $R_e$  at 6-8 km altitude. Dust concentrations on May 12  
28 start to increase at  $\sim 5 \text{ km}$ , above which SAGA data are mostly missing. Hereafter, we identify data on May 5 and  
29 12 at 6-7 km and on May 7 below 1.5 km in altitude as representative of dust plumes.

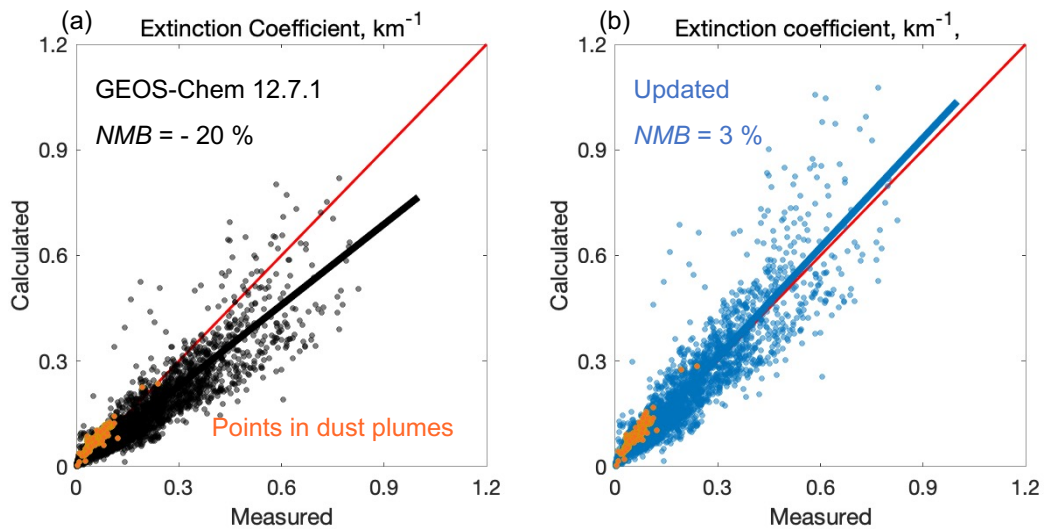

30

31 Figure S1. Scatter plots of extinction coefficients between in situ measurements (nephelometer + PSAPs; at ambient  
 32 RH) and calculations from the measured mass concentrations of major aerosol components (sulfate-nitrate-  
 33 ammonium, organics, black carbon, and dust), and measured RH, with aerosol optical properties from standard  
 34 GEOS-Chem version 12.7.1 (panel a) and from updates in this study (panel b; Table 3 in the main text). Normalized  
 35 mean biases (*NMBs*) inset are for the comparison of calculated and in-situ measured extinction coefficients. No  
 36 significant bias was seen for measurement in dust plumes.

37

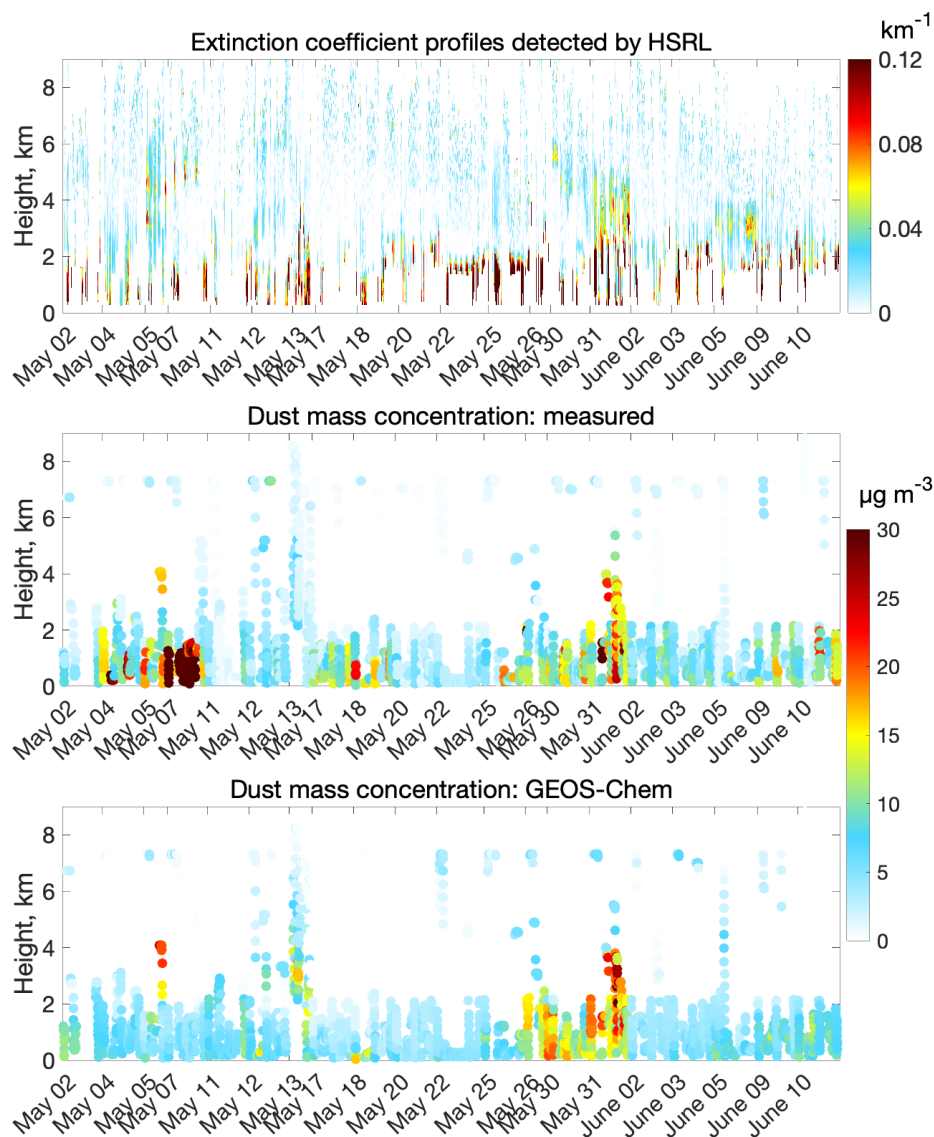

38  
 39 Figure S2. Extinction coefficient profiles (532 nm) and dust concentration along the flight tracks during KORUS-  
 40 AQ. The extinction coefficients were detected by High Spectral Resolution Lidar (HSRL). Extinction coefficient  
 41 profiles on individual days can be found at: <https://science-data.larc.nasa.gov/lidar/korus-aq/>. Measured dust  
 42 concentration is derived from SAGA Ca<sup>2+</sup> and Na<sup>+</sup> as explained in the main text. GEOS-Chem dust is sampled at the  
 43 flight tracks.

44

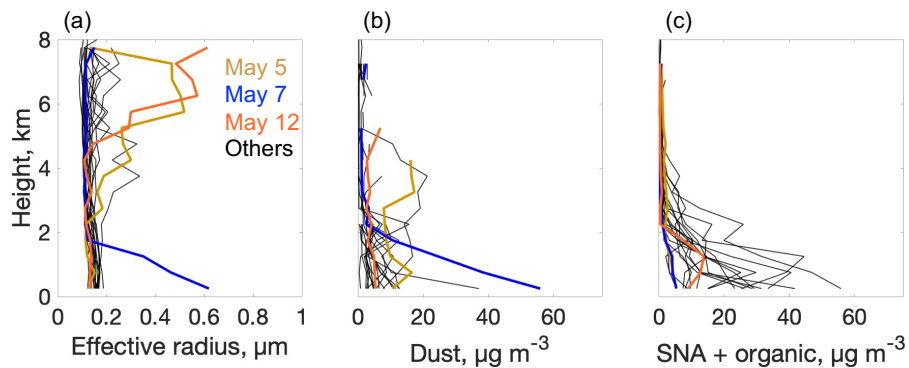

45

46 Figure S3. Vertical profiles of measured median (a) cross-section weighted effective radius ( $R_e$ ), (b) dust  
 47 concentration, and (c) sulfate-nitrate-ammonium (SNA) + organic aerosol concentration during KORUS-AQ.  
 48 Profiles on dust events are bold colored. Dust concentration is derived from  $\text{Ca}^{2+}$  and  $\text{Na}^+$  measurements as  
 49 described in the main text. SNA + organic aerosols are measured by AMS. The incomplete lines for dust  
 50 concentration profiles are due to missing data. Sampling SNA + organic concentration data at available dust  
 51 observation points doesn't change the profile features in (c).

52

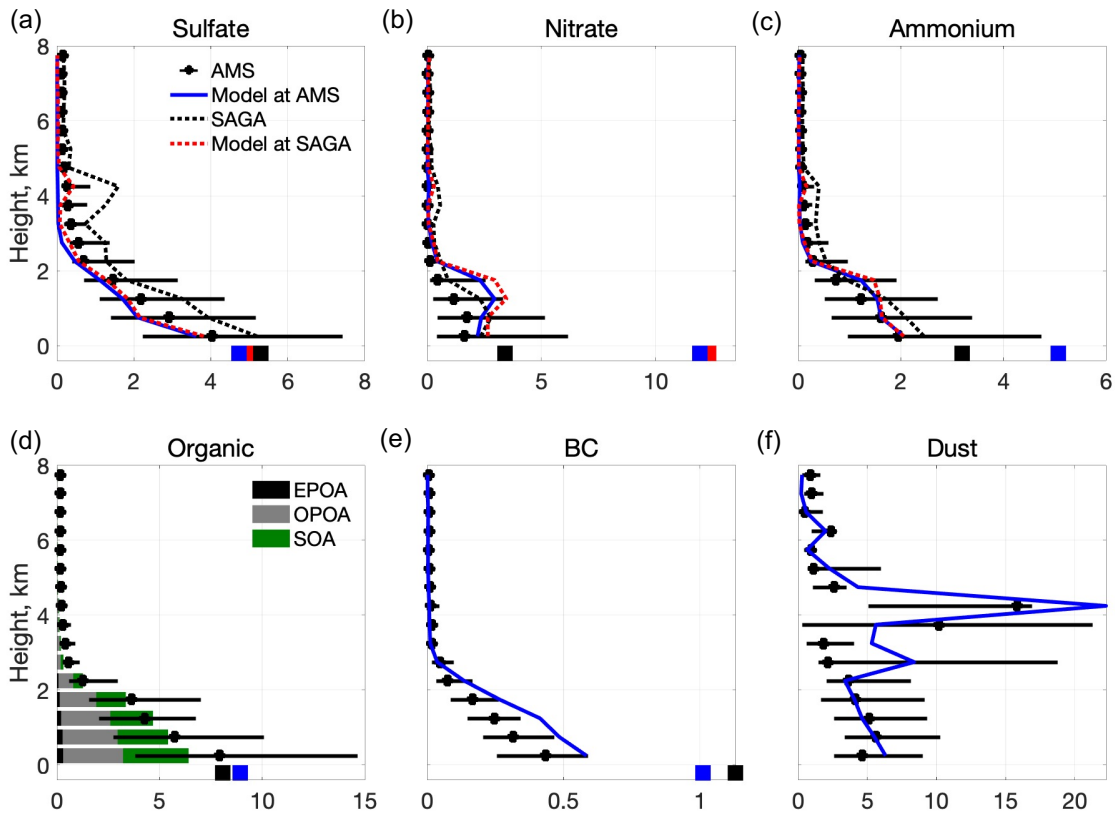

53  
 54 Figure S4. Median vertical profiles of aerosols during KORUS-AQ from measurements (error bars are 25 - 75<sup>th</sup>  
 55 percentiles) and GEOS-Chem. For sulfate, nitrate, and ammonium, both AMS and SAGA measurements are shown.  
 56 Concentration at the surface from both measurements and the model are shown by color filled squares. Modeled  
 57 sulfate and nitrate at AMS are ammonium associated sulfate and nitrate. Modeled sulfate and nitrate at SAGA  
 58 include sulfate and nitrate associated with ammonium and dust with geometric diameter < 2.5  $\mu\text{m}$ , to be consistent  
 59 with SAGA measurements (Table 2 in the main text). Organic aerosol is broken down into freshly emitted primary  
 60 organic aerosol (EPOA), oxygenated primary organic aerosol (OPOA), and lumped secondary organic aerosol  
 61 (SOA) by the simple SOA scheme in GEOS-Chem. In the GEOS-Chem simple SOA scheme, 50% primarily emitted  
 62 organics is assumed to be OPOA (near-field oxidation of EPOA), and the rest 50% organics emitted as EPOA is  
 63 converted to OPOA with a lifetime of 1.15d. SOA is scaled from biogenic (isoprene, monoterpene, and  
 64 sesquiterpenes), fire (CO), and anthropogenic (CO) emissions as described by Pai et al. (2020). Vertical profiles are  
 65 shown for all 20 flights during KORUS-AQ. Surface data are from May 9 to June 10 on flight days, so that median  
 66 values across sites are slightly different from that inset in Figure 4 in the main text. All data are averaged over 500-  
 67 m vertical bins. Here and elsewhere, we excluded 3.4% of the data as pollution plumes diagnosed by either  $\text{NO}_2$  or  
 68  $\text{SO}_2 > 10$  ppbv.

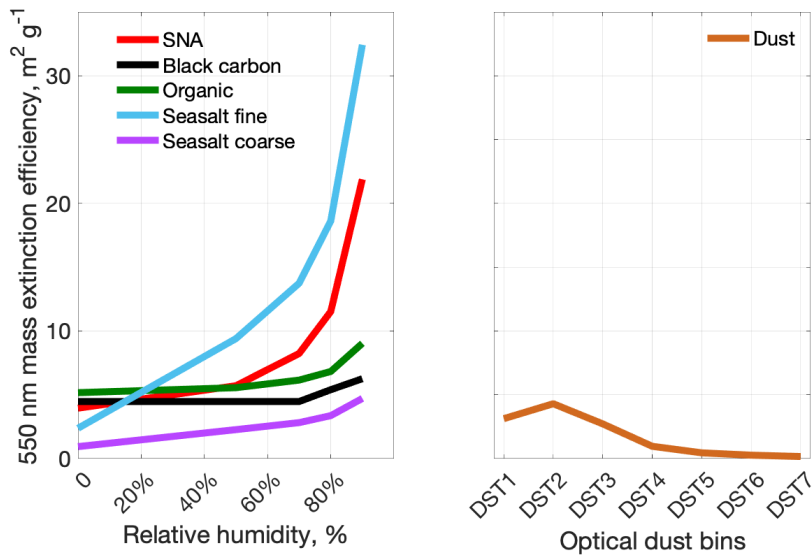

69

70

Figure S5. Mass extinction efficiency of different aerosol components based on GEOS-Chem aerosol optical

71

properties in Table 3 in the main text. The 7 dust size bins (DST1-7) are centered at radii of 0.15, 0.25, 0.4, 0.8, 1.5,

72

2.5, and 4.0  $\mu\text{m}$ .

73

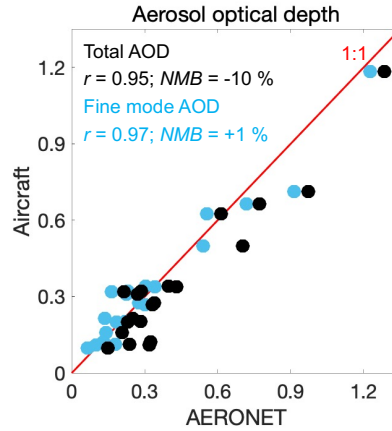

74

75 Figure S6. Mean aerosol optical depth (AOD) inferred from KORUS-AQ aircraft data for each of the 20 flights over  
 76 2 May - 10 June 2016 compared to the mean AOD observed on the flight days at 21 AERONET sites operated  
 77 across South Korea. AOD from the aircraft data are the integrals of the vertically binned in situ extinction  
 78 coefficients along the flight tracks. AERONET AOD are daily mean values reported for total aerosol and fine-mode  
 79 aerosol. The distribution of AERONET sites is shown in Figure 4. Statistics inset are for the correlation coefficient  
 80 ( $r$ ) and normalized mean biases ( $NMBs$ ). Comparison to the AERONET total AOD indicates a normalized mean bias  
 81 ( $NMB$ ) of -10%, which might reflect spatial/temporal sampling differences like limited aircraft sampling at surface  
 82 layer below 150 m and that aircraft AOD do not include aerosol extinctions in the stratosphere (Murphy et al.,  
 83 2020), but may also be due to a cutoff aerodynamic diameter of  $\sim 4 \mu\text{m}$  for the aircraft nephelometers (Mcnaughton  
 84 et al., 2007). Indeed, the bias disappears when the aircraft AOD is compared to the reported fine-mode AERONET  
 85 AOD.

86

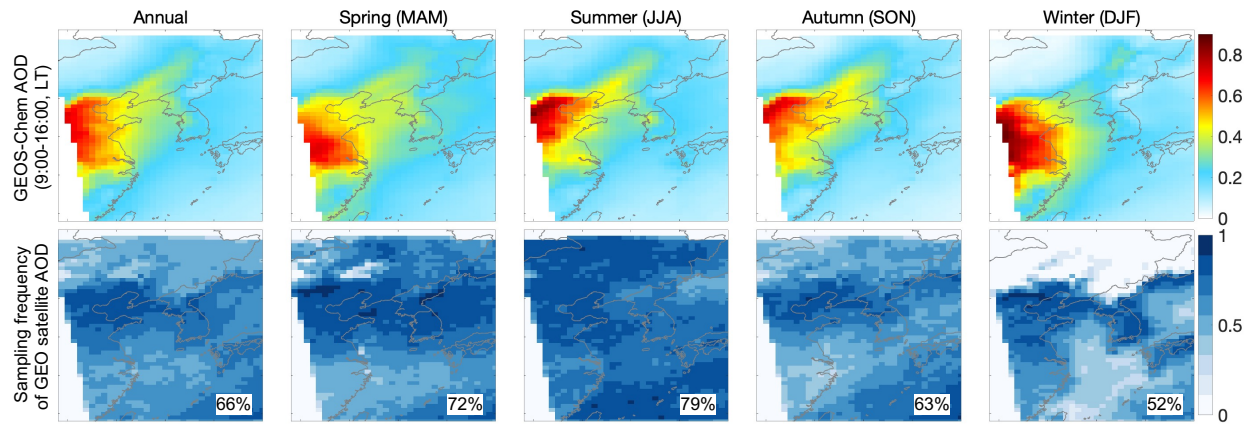

87  
 88 Figure S7. Spatial distributions of 2016 annual and seasonal mean GEOS-Chem all-sky AOD (9:00 - 16:00, LT  
 89 mean AOD without filtering out cloudy conditions detected by GEO satellites) and the sampling efficiency  
 90 (proportion of days with successful sampling) of the fused geostationary satellite AOD product.

91



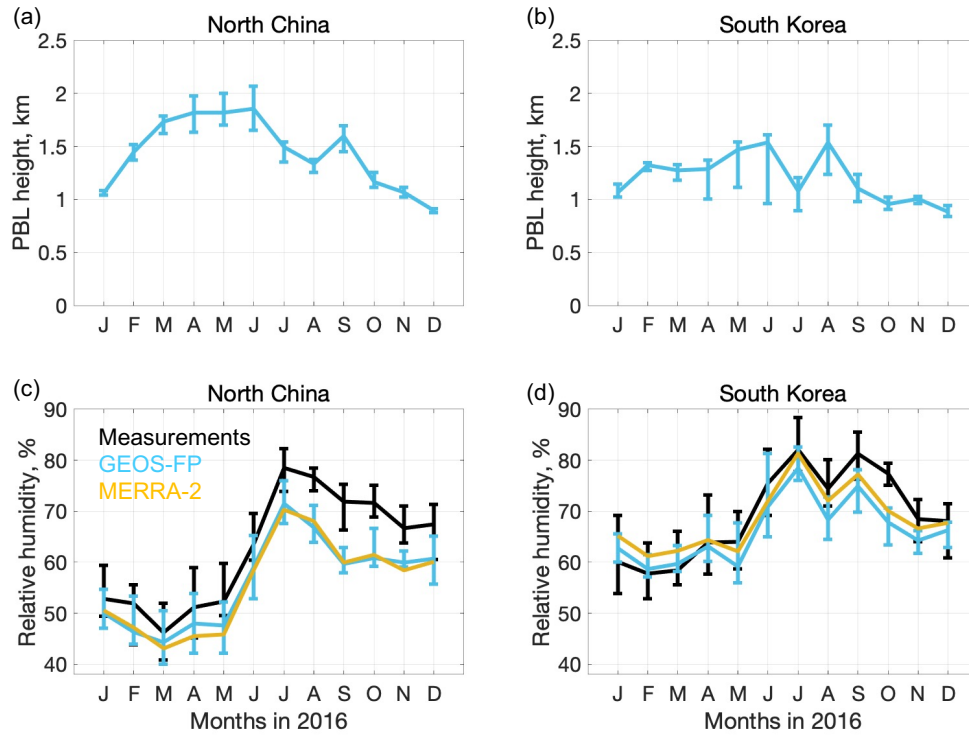

92

93

Figure S8. Monthly series of median (error bars: 25<sup>th</sup> and 75<sup>th</sup> percentiles) GEOS-FP daytime (9:00-16:00 LT)

94

maximum PBLH heights and daily relative humidity (RH) over the North China and South Korea regions. The

95

measured RH are from the national climatic datasets of China (data.cma.cn) and South Korea (data.kma.go.kr). RH

96

from MERRA2 is similar to that from GEOS-FP.

97

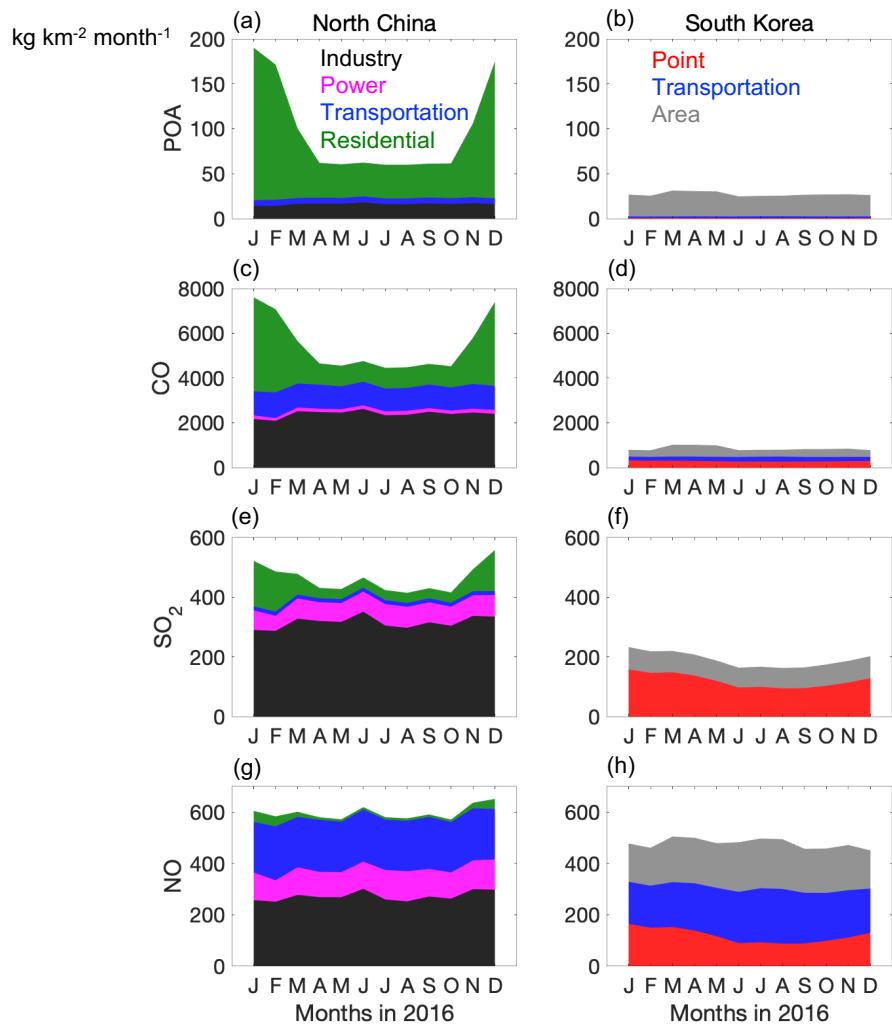

98  
 99 Figure S9. Monthly series of sector-specific emission intensities for primary organic aerosol (POA), CO, SO<sub>2</sub> and  
 100 NO over North China and South Korea regions used in driving the GEOS-Chem model. Emissions over North China  
 101 are from the MEIC emission inventory for 2016 and emissions over South Korea are from the KORUSv5 emission  
 102 inventory at base year 2015. The two emission inventories are distinguished from different sector categories in this  
 103 graph. The ‘area’ source category in KORUSv5 includes residential and scattered low-height industrial combustion  
 104 and process (Woo et al., 2020). The ‘point’ source category in KORUSv5 includes large point sources from power  
 105 plants and industry (Woo et al., 2020).

106

107 **References**

- 108 Chin, M., Ginoux, P., Kinne, S., Torres, O., Holben, B. N., Duncan, B. N., Martin, R. V., Logan, J. A., Higurashi,  
109 A., and Nakajima, T.: Tropospheric Aerosol Optical Thickness from the GOCART Model and Comparisons with  
110 Satellite and Sun Photometer Measurements, *J. Atmos. Sci.*, 59, 461-483, [https://doi.org/10.1175/1520-0469\(2002\)059<0461:TAOTFT>2.0.CO;2](https://doi.org/10.1175/1520-0469(2002)059<0461:TAOTFT>2.0.CO;2), 2002.
- 112 Heim, E. W., Dibb, J., Scheuer, E., Jost, P. C., Nault, B. A., Jimenez, J. L., Peterson, D., Knote, C., Fenn, M., Hair,  
113 J., Beyersdorf, A. J., Corr, C., and Anderson, B. E.: Asian dust observed during KORUS-AQ facilitates the uptake  
114 and incorporation of soluble pollutants during transport to South Korea, *Atmospheric Environment*, 224, 117305,  
115 <https://doi.org/10.1016/j.atmosenv.2020.117305>, 2020.
- 116 Liu, P., Zhao, C., Liu, P., Deng, Z., Huang, M., Ma, X., and Tie, X.: Aircraft study of aerosol vertical distributions  
117 over Beijing and their optical properties, *Tellus B: Chemical and Physical Meteorology*, 61, 756-767,  
118 [10.1111/j.1600-0889.2009.00440.x](https://doi.org/10.1111/j.1600-0889.2009.00440.x), 2009.
- 119 McNaughton, C. S., Clarke, A. D., Howell, S. G., Pinkerton, M., Anderson, B., Thornhill, L., Hudgins, C.,  
120 Winstead, E., Dibb, J. E., Scheuer, E., and Maring, H.: Results from the DC-8 Inlet Characterization Experiment  
121 (DICE): Airborne Versus Surface Sampling of Mineral Dust and Sea Salt Aerosols, *Aerosol Sci. Tech.*, 41, 136-159,  
122 <https://doi.org/10.1080/02786820601118406>, 2007.
- 123 Murphy, D. M., Froyd, K. D., Bourgeois, I., Brock, C. A., Kupc, A., Peischl, J., Schill, G. P., Thompson, C. R.,  
124 Williamson, C. J., and Yu, P.: Radiative and chemical implications of the size and composition of aerosol particles  
125 in the existing or modified global stratosphere, *Atmos. Chem. Phys. Discuss.*, 2020, 1-32, [10.5194/acp-2020-909](https://doi.org/10.5194/acp-2020-909),  
126 2020.
- 127 Pai, S. J., Heald, C. L., Pierce, J. R., Farina, S. C., Marais, E. A., Jimenez, J. L., Campuzano-Jost, P., Nault, B. A.,  
128 Middlebrook, A. M., Coe, H., Shilling, J. E., Bahreini, R., Dingle, J. H., and Vu, K.: An evaluation of global organic  
129 aerosol schemes using airborne observations, *Atmos. Chem. Phys.*, 20, 2637-2665, <https://doi.org/10.5194/acp-20-2637-2020>, 2020.
- 131 Peterson, D. A., Hyer, E. J., Han, S.-O., Crawford, J. H., Park, R. J., Holz, R., Kuehn, R. E., Eloranta, E., Knote, C.,  
132 Jordan, C. E., and Lefer, B. L.: Meteorology influencing springtime air quality, pollution transport, and visibility in  
133 Korea, *Elementa-Sci. Anthropol.*, 7, 57, <https://doi.org/10.1525/elementa.395>, 2019.
- 134 Woo, J.-H., Kim, Y., Kim, H.-K., Choi, K.-C., Eum, J.-H., Lee, J.-B., Lim, J.-H., Kim, J., and Seong, M.:  
135 Development of the CREATE Inventory in Support of Integrated Climate and Air Quality Modeling for Asia,  
136 *Sustainability*, 12, 7930, <https://doi.org/10.3390/su12197930>, 2020.
- 137
